# Supplementary material for: Raman spectroscopy for the evaluation of the radiobiological sensitivity of normal human breast cells at different time points after irradiation by a clinical proton beam
Source: Royal Society of Chemistry journal article supplement (doi:10.1039/c8an02155d), 2019-01-01
Supplement: c8an02155d1.pdf [file c8an02155d1.pdf]

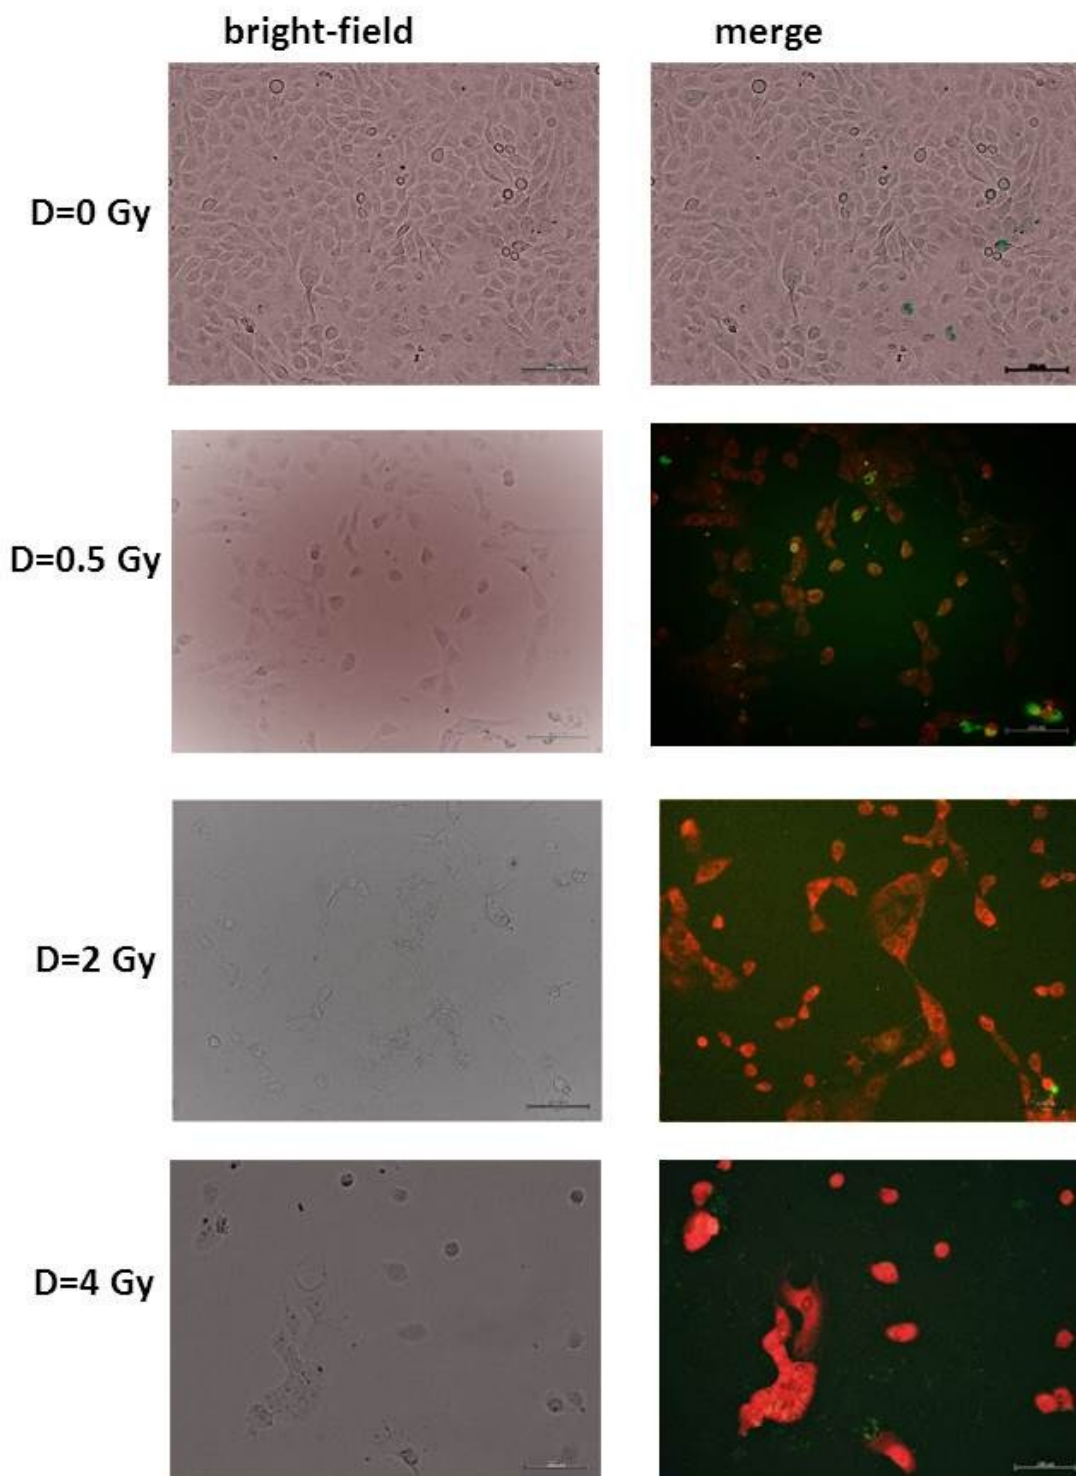

**Supplementary Fig. 1.** Representative bright-field (left column) and bright-field and fluorescence merged (right column) images of apoptotic and necrotic cells labeled with Annexin V-FITC Apoptosis Kit, fixed 48 h after irradiation at different doses of a proton beam. Cells were visualized by an inverted fluorescence microscope (Olympus IX 71) using a X10 objective. Scale bar is 100  $\mu\text{m}$ . Apoptotic cells (Annexin V conjugated) appear green, necrotic cells (propidium iodide conjugated) appear red. Merged = overlay of propidium iodide and Annexin V conjugated.

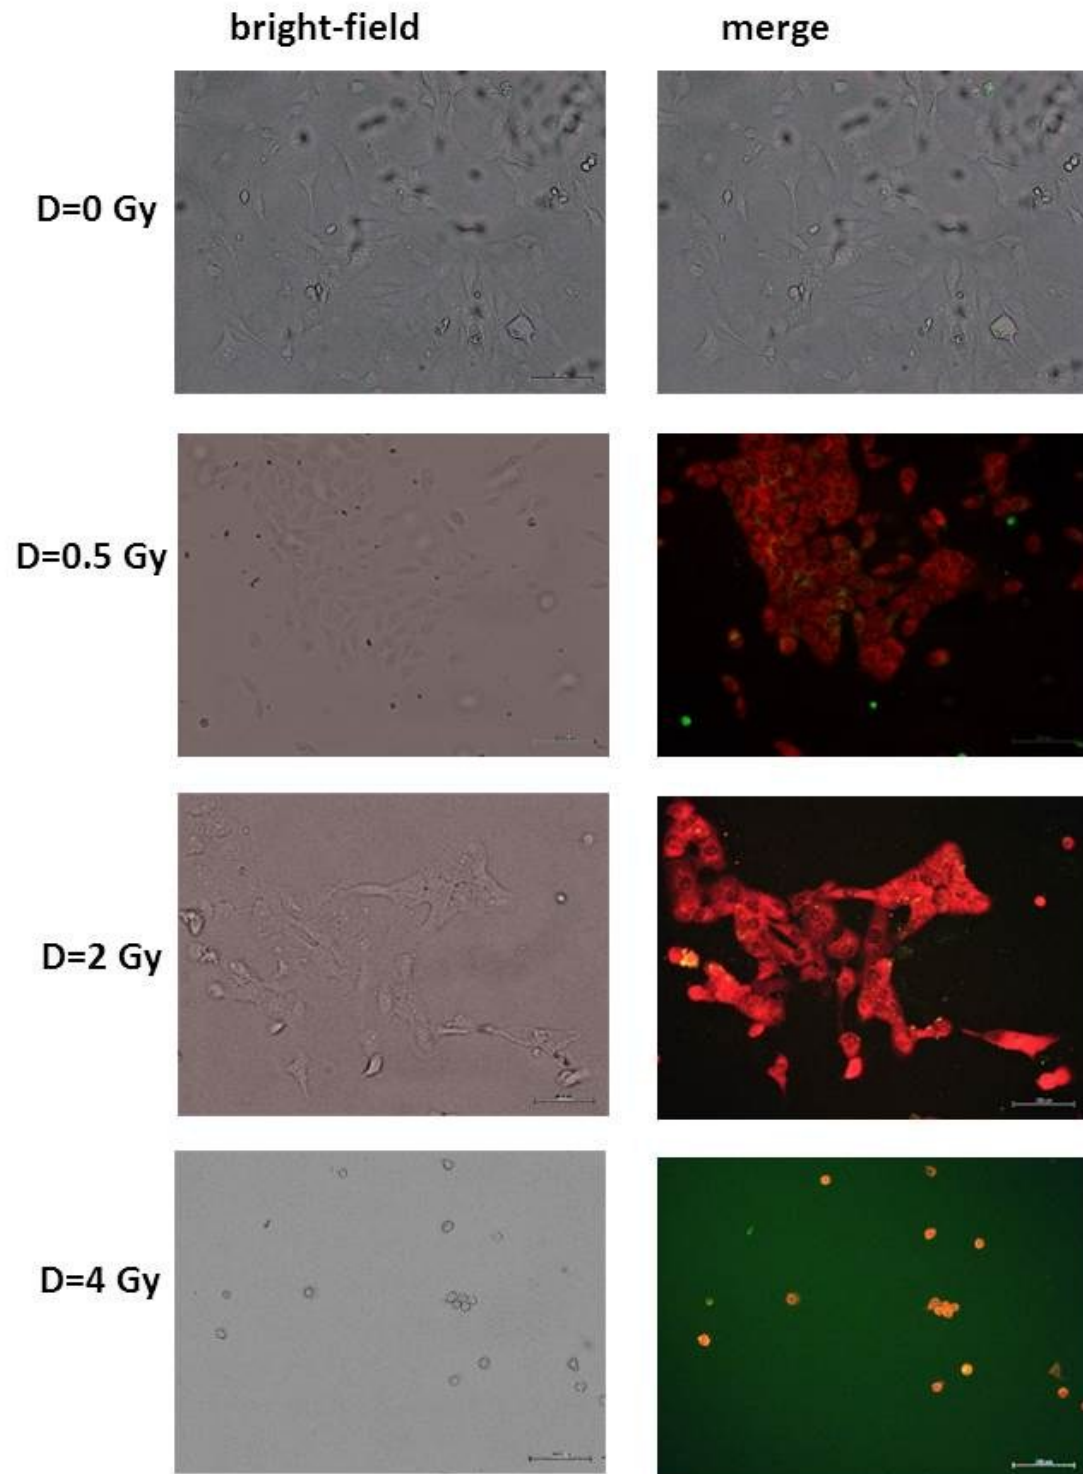

**Supplementary Fig. 2.** Representative bright-field (left column) and bright-field and fluorescence merged (right column) images of apoptotic and necrotic cells labeled with Annexin V-FITC Apoptosis Kit, fixed 72 h after irradiation at different doses of a proton beam. Cells were visualized by an inverted fluorescence microscope (Olympus IX 71) using a X10 objective. Scale bar is 100  $\mu\text{m}$ . Apoptotic cells (Annexin V conjugated) appear green, necrotic cells (propidium iodide conjugated) appear red. Merged = overlay of propidium iodide and Annexin V conjugated.

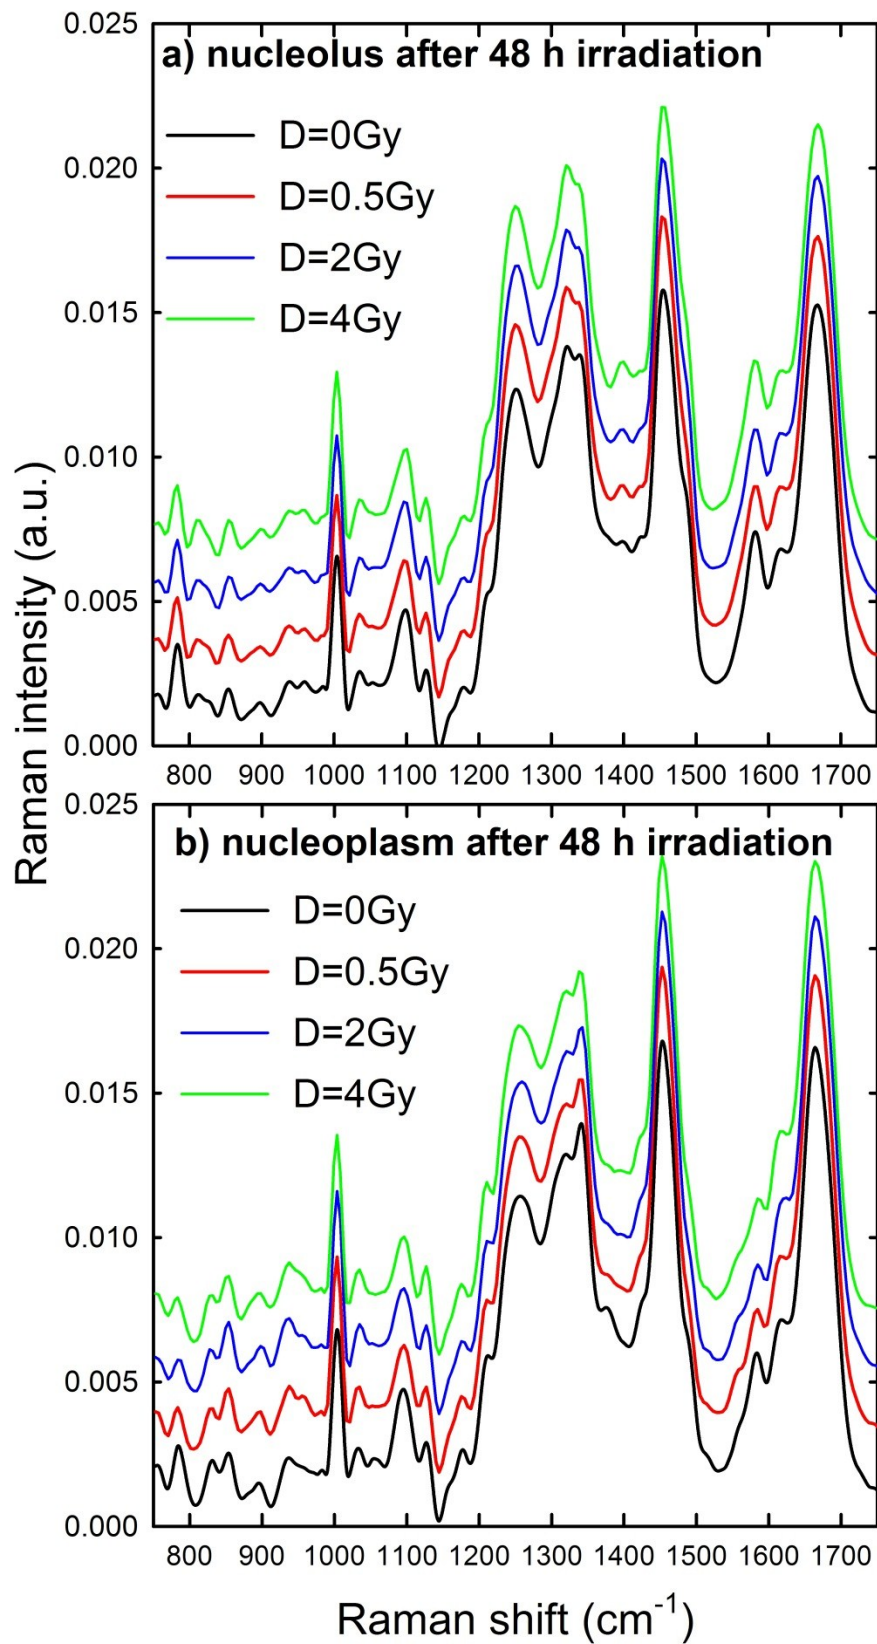

**Supplementary Fig. 3.** Average Raman spectra of single control (black line), 0.5 Gy (red line), 2 Gy (blue line) and 4 Gy (green line) exposed MCF10A cells (about 30 for each dose), fixed 48 h after irradiation. The spectra have been measured by focusing the exciting laser spot above the nucleolus (a) and nucleoplasm (b) domains and the average signals have been intensity-shifted for clarity purpose.

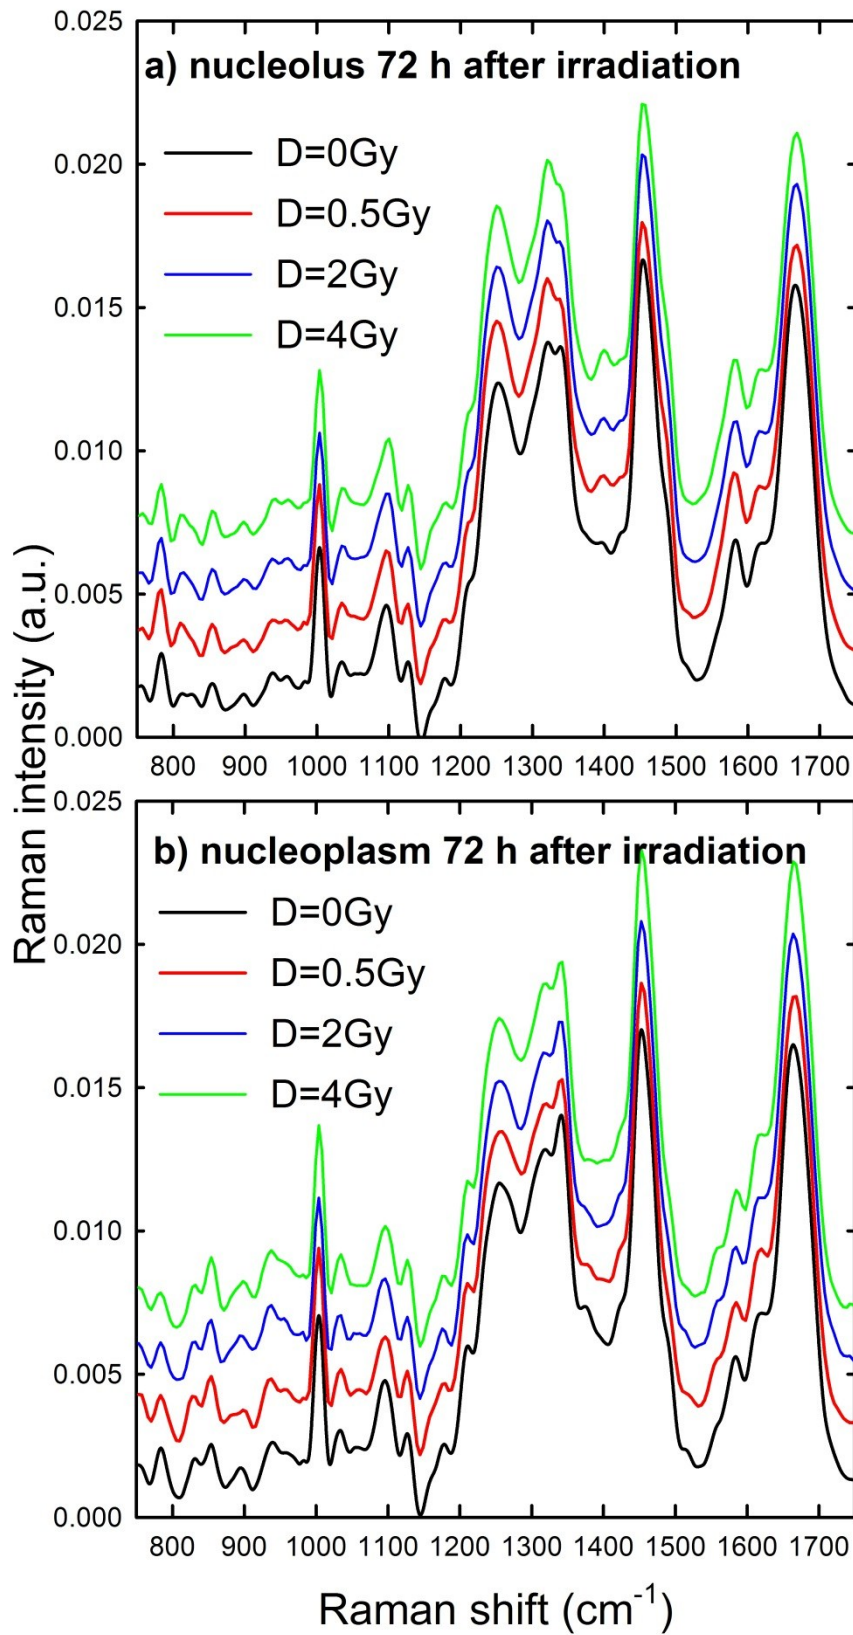

**Supplementary Fig. 4.** Average Raman spectra of single control (black line), 0.5 Gy (red line), 2 Gy (blue line) and 4 Gy (green line) exposed MCF10A cells (about 30 for each dose), fixed 72 h after irradiation. The spectra have been measured by focusing the exciting laser spot above the nucleolus (a) and nucleoplasm (b) domains and the average signals have been intensity-shifted for clarity purpose.
